# Supplementary material for: Impairment of Renal and Hematopoietic Stem/Progenitor Cell Compartments in Frailty Syndrome: Link With Oxidative Stress, Plasma Cytokine Profiles, and Nuclear DNA Damage
Source: PubMed Central journal article supplement — J Gerontol A Biol Sci Med Sci. 2024 Jul 27;79(11):glae188. doi: 10.1093/gerona/glae188 (PMC11439494; doi:10.1093/gerona/glae188), 2024-07-27
Supplement: glae188_suppl_supplementary_material.pdf [file glae188_suppl_supplementary_material.pdf]

## Supplementary eMaterial

Manuscript S. Bombelli et al

|                                                                                                                                                                                                      |                          |
|------------------------------------------------------------------------------------------------------------------------------------------------------------------------------------------------------|--------------------------|
| <b>Supplementary eFigure 1.</b><br>Representative flow cytometry dot plots of gating strategy.<br>Related to Figure 2C, 2E and 3B.                                                                   | pag 2                    |
| <b>Supplementary eFigure 2.</b><br>Representative flow cytometry dot plots.<br>Related to Figure 2D.                                                                                                 | pag 3                    |
| <b>Supplementary eFigure 3.</b><br>Human renal cells growing as nephrospheres (NS) for 10 days in<br>presence of different concentrations of H <sub>2</sub> O <sub>2</sub> .                         | pag 4                    |
| <b>Supplementary eTable 1, A and B.</b><br>Specific characteristics of each individual.<br>Supplementary eTable 1A related to Figure 1B.<br>Supplementary eTable 1B related to Figure 1C.            | Supplementary Excel file |
| <b>Supplementary eTable 2.</b><br>Nephrosphere cultures performed for treating allogeneic renal<br>stem/progenitor cells                                                                             | pag 5                    |
| <b>Supplementary eTable 3.</b><br>Treatment of Nephrosphere cultures<br>Related to Figure 2A-F                                                                                                       | Supplementary Excel file |
| <b>Supplementary eTable 4.</b><br>Percentage of autologous DNA-damaged $\gamma$ -H2AX+ cHPSC<br>( $\gamma$ H2AXcHPSC) - Related to Figure 2G                                                         | pag 6                    |
| <b>Supplementary eTable 5, A and B</b><br>Plasma oxysterol concentrations - Related to Figure 3A                                                                                                     | pag 7                    |
| <b>Supplementary eTable 6</b><br>Intracellular ROS formation - - Related to Figure 3B                                                                                                                | pag 9                    |
| <b>Supplementary eTable 7, A and B.</b><br>Plasma inflammatory cytokine characteristics.<br>Supplementary eTable 7A related to Figure 3C and Table 1A<br>Supplementary eTable 7B related to Table 1B | Supplementary Excel file |
| <b>Supplementary eTable 8.</b><br>Principal component analysis (PCA).<br>Related to Figure 4                                                                                                         | pag 10                   |
| <b>Supplementary eMethod.</b>                                                                                                                                                                        | pag 11                   |
| <b>Supplementary eReferences.</b>                                                                                                                                                                    | pag 13                   |

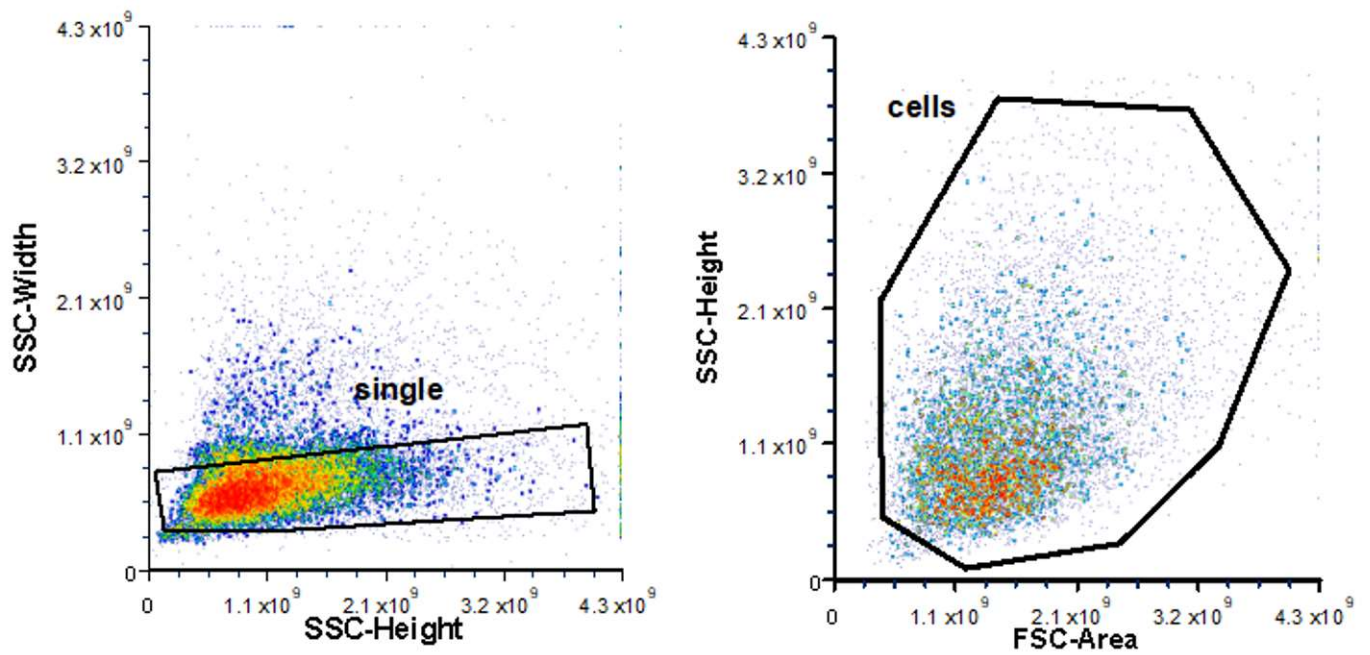

**Supplementary eFigure 1. Representative flow cytometry dot plots of gating strategy.**

Applied to NS cells treated with plasma samples and analyzed for proliferation (Figure 2C), DNA damage (Figure 2E) and intracellular ROS (Figure 3B). Doublets were first excluded (left) and then the cell population (FSC vs SSC) was identified (right).

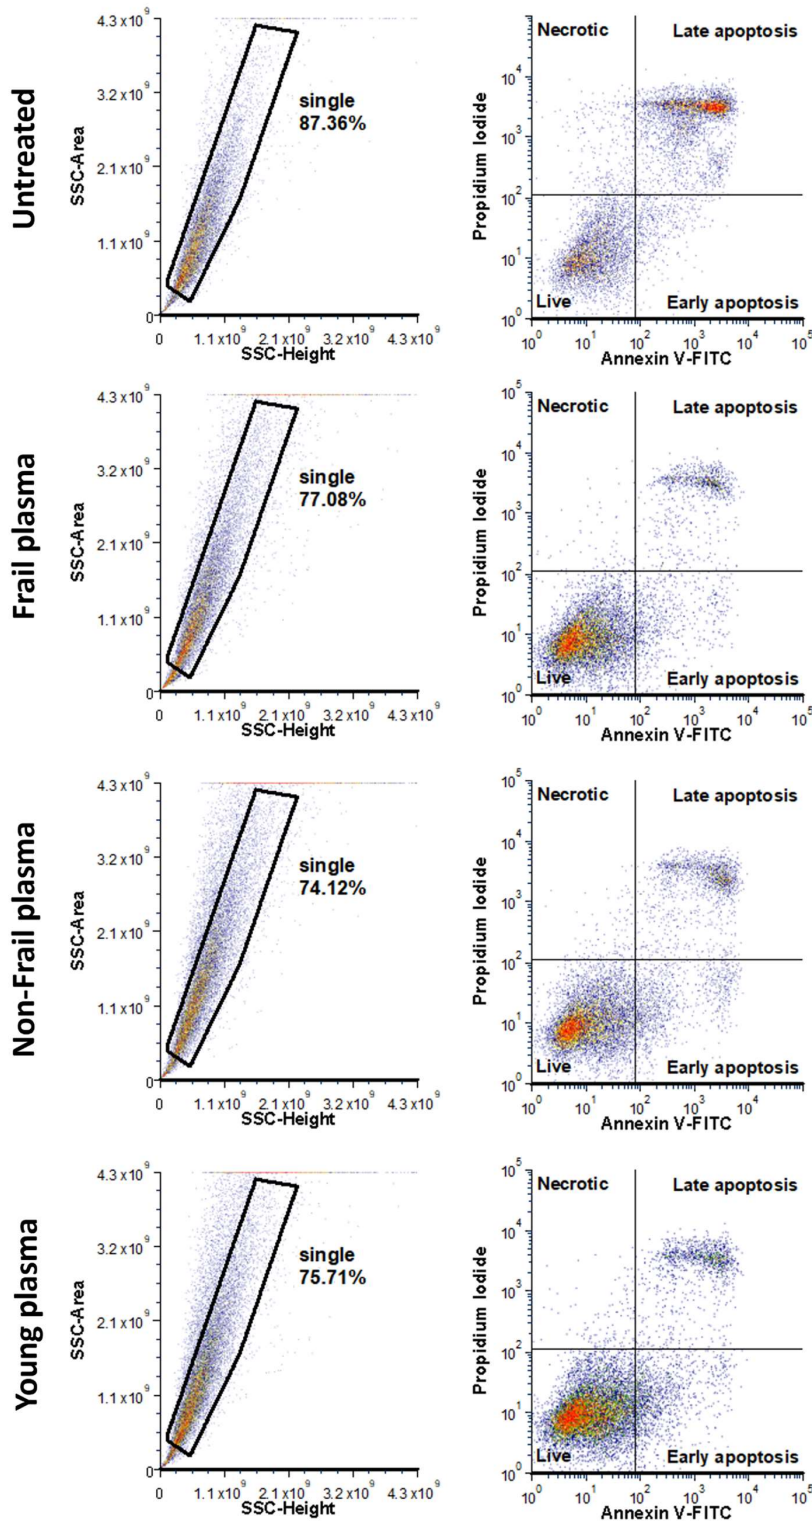

**Supplementary eFigure 2. Representative flow cytometry dot plots related to Fig. 2D.**

Dissociated NS cells derived from 12 NS cultures grown in presence of 17 frail, 16 non-frail, 16 young individual plasma sample. Each plasma sample was tested on 2-3 different independent NS cell cultures. The dissociated NS cells were stained with FITC Annexin V Apoptosis Detection Kit with Propidium Iodide (Biolegend, San Diego, CA, USA) following the manufacturer's instructions. Live, Early apoptotic, Late apoptotic, Necrotic cells were analyzed after doublets exclusion (dot plots on the left).

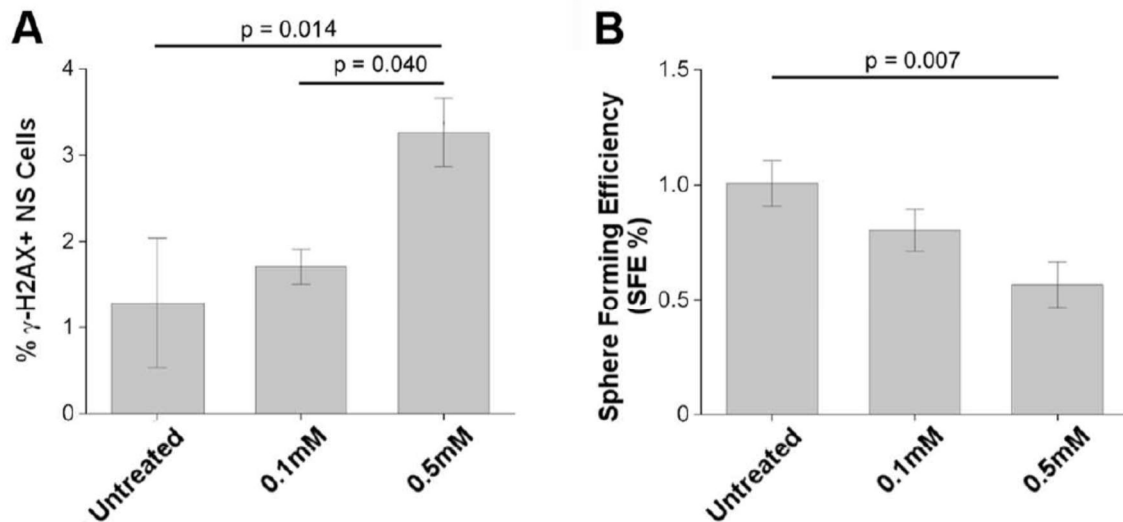

| A) Percentage of $\gamma$ -H2AX+ NS cells after treatment with different concentration of H2O2 |           |             |            |
|------------------------------------------------------------------------------------------------|-----------|-------------|------------|
| Cultures                                                                                       | Untreated | 0.1 mM H2O2 | 0.5mM H2O2 |
| C266                                                                                           | 0.70      | 1.87        | 2.96       |
| C292                                                                                           | 2.29      | 1.82        | 3.04       |
| C293                                                                                           | 0.87      | 1.44        | 3.79       |
| B) Percentage of SFE of renal cells growing as NS treated with different concentration of H2O2 |           |             |            |
| Cultures                                                                                       | Untreated | 0.1 mM H2O2 | 0.5mM H2O2 |
| C266                                                                                           | 1.04      | 0.77        | 0.66       |
| C292                                                                                           | 0.88      | 0.72        | 0.44       |
| C293                                                                                           | 1.10      | 0.92        | 0.60       |

**Supplementary eFigure 3. Human renal cells growing as nephrospheres (NS) for 10 days in presence of different concentrations of H2O2.** (A) Percentage of DNA-damaged  $\gamma$ -H2AX+ NS cells after the indicated H2O2 treatments, flow cytometry data on dissociated NS cells. (B) Sphere Forming Efficiency (SFE %) of renal cells grown as NS, with the indicated concentration of H2O2, confocal microscopy data. In the graphs, the data shown in the table are expressed as mean $\pm$ S.E.M.  $p$  value < 0.05 obtained with one-way ANOVA with Tukey's test for pairwise multiple comparison was considered significant (ORIGINPRO 2016 Software). Cultures from 3 different renal tissues (1 male, 2 females; median age 68 years, range 64-76 years. See Supplementary eTable 2).

**Supplementary eTable 2. Nephrosphere cultures performed for treating allogeneic renal stem/progenitor cells**

| Nephrosphere cultures established from healthy renal tissues | Sex of renal tissue   | Age of patients (years)   | Diagnosis for nephrectomy                  | Treatment:<br>17 frail, 16 nonfrail,<br>16 young plasma                                                 | Treatment:<br>7 frail, 4 nonfrail<br>4 young plasma         | Treatment:<br>5 frail, 5 nonfrail,<br>5 young plasma                  | Treatment:<br>H2O2 0.1mM<br>H2O2 0.5 mM                      |
|--------------------------------------------------------------|-----------------------|---------------------------|--------------------------------------------|---------------------------------------------------------------------------------------------------------|-------------------------------------------------------------|-----------------------------------------------------------------------|--------------------------------------------------------------|
|                                                              |                       |                           |                                            | Evaluated variables:<br>SFE, Ki-67, proliferation, apoptosis, necrosis, DNA damage, flow cytometry data | Evaluated variables:<br>DNA damage on cytopinned NS cells   | Evaluated variables:<br>intracellular ROS by DCF, flow cytometry data | Evaluated variables:<br>DNA damage, SFE, flow cytometry data |
| C258                                                         | Male                  | 66                        | Renal Cell Carcinoma clear cell G2         |                                                                                                         | performed                                                   |                                                                       |                                                              |
| C263                                                         | Male                  | 57                        | Chronic Pyelonephritis                     |                                                                                                         |                                                             | performed                                                             |                                                              |
| C265                                                         | Male                  | 75                        | Renal Cell Carcinoma clear cell G3         |                                                                                                         |                                                             | performed                                                             |                                                              |
| C266                                                         | Female                | 68                        | Renal Cell Carcinoma clear cell G2         |                                                                                                         |                                                             |                                                                       | performed                                                    |
| C284                                                         | Female                | 57                        | Renal Cell Carcinoma clear cell G1         |                                                                                                         | performed                                                   |                                                                       |                                                              |
| C288                                                         | Female                | 61                        | Chronic Pyelonephritis                     | performed                                                                                               |                                                             |                                                                       |                                                              |
| C292                                                         | Male                  | 64                        | Renal Cell Carcinoma clear cell G4         |                                                                                                         |                                                             |                                                                       | performed                                                    |
| C293                                                         | Female                | 76                        | Urothelial Carcinoma High Grade            |                                                                                                         |                                                             |                                                                       | performed                                                    |
| C298                                                         | Male                  | 71                        | Renal Cell Carcinoma clear cell G1         | performed                                                                                               |                                                             |                                                                       |                                                              |
| C299a-C299b                                                  | Female                | 64                        | Renal Cell Carcinoma clear cell G1         | performed a-b                                                                                           |                                                             |                                                                       |                                                              |
| C300                                                         | Female                | 48                        | Renal Cell Carcinoma clear cell G3-4       | performed                                                                                               |                                                             |                                                                       |                                                              |
| C302                                                         | Male                  | 69                        | Renal Cell Carcinoma clear cell G4         | performed                                                                                               |                                                             |                                                                       |                                                              |
| C305                                                         | Female                | 76                        | Chronic Xanthogranulomatous pyelonephritis | performed                                                                                               |                                                             |                                                                       |                                                              |
| C306                                                         | Female                | 67                        | Renal Cell Carcinoma clear cell G2         | performed                                                                                               |                                                             |                                                                       |                                                              |
| C308                                                         | Male                  | 75                        | Renal Cell Carcinoma papillary type2 G2    | performed                                                                                               |                                                             |                                                                       |                                                              |
| C311                                                         | Male                  | 48                        | Renal Cell Carcinoma clear cell G3         | performed                                                                                               |                                                             |                                                                       |                                                              |
| C312                                                         | Male                  | 73                        | Renal Cell Carcinoma clear cell G2         | performed                                                                                               |                                                             |                                                                       |                                                              |
| C316                                                         | Male                  | 77                        | Renal Cell Carcinoma clear cell G2         |                                                                                                         |                                                             | performed                                                             |                                                              |
| C318                                                         | Female                | 84                        | Renal Cell Carcinoma chromophobe           |                                                                                                         |                                                             | performed                                                             |                                                              |
| C319                                                         | Male                  | 64                        | Oncocitoma Low Grade                       |                                                                                                         |                                                             | performed                                                             |                                                              |
| C321                                                         | Male                  | 81                        | Urothelial Carcinoma                       |                                                                                                         | performed                                                   |                                                                       |                                                              |
|                                                              | 12 Males<br>9 Females | Median=68,<br>Range 48-84 |                                            | 5 Males, 5 Females;<br>Median=68 years,<br>Range 48-76 years                                            | 2 Males, 1 Female;<br>Median=66 years,<br>Range 57-81 years | 4 Males 1 Female;<br>Median=75 years,<br>Range 57-84 years            | 1 Male 2 Females;<br>Median=68 years,<br>Range 64-76 years   |

**Supplementary eTable 4. Percentage of autologous DNA-damaged  $\gamma$ -H2AX+ cHPSC ( $\gamma$ H2AXcHPSC)**

| Identification patients and plasma (Sex/Age) | PHENOTYPE | % autologous $\gamma$ H2AXcHPSC | Identification patients and plasma (Sex/Age) | PHENOTYPE | % autologous $\gamma$ H2AXcHPSC | Identification patients and plasma (Sex/Age) | PHENOTYPE | % autologous $\gamma$ H2AXcHPSC |
|----------------------------------------------|-----------|---------------------------------|----------------------------------------------|-----------|---------------------------------|----------------------------------------------|-----------|---------------------------------|
| 16 (F/91)                                    | FRAIL     | 0.3436 a                        | 57 (M/69)                                    | NON-FRAIL | 1.4286 d                        | 121 (M/28)                                   | YOUNG     | 0.1684 a                        |
| 17 (M/70)                                    | FRAIL     | 0.6468 a                        | 58 (F/67))                                   | NON-FRAIL | 0 a,d,e                         | 122 (M/30)                                   | YOUNG     | 0.4706 a                        |
| 19 (F/84)                                    | FRAIL     | 0.5338 a,d,e                    | 59 (M/85)                                    | NON-FRAIL | 0.303 a,d,e                     | 123 (F/29)                                   | YOUNG     | 3.44 a,d,e                      |
| 20 (M/84)                                    | FRAIL     | 2.7439 a                        | 60 (M/87)                                    | NON-FRAIL | 0.5427 a,d,e                    | 124 (F/30)                                   | YOUNG     | 0.3891 a                        |
| 21 (F/88)                                    | FRAIL     | 10.48 a                         | 61 (F/66)                                    | NON-FRAIL | 0.5357 a,d,e                    | 125 (F/27)                                   | YOUNG     | 0.2444 a                        |
| 22 (M/90)                                    | FRAIL     | 2.4691 b,c,d                    | 62 (M/66)                                    | NON-FRAIL | 2.5974 a,d,e                    | 126 (M/34)                                   | YOUNG     | 0.1074 a,d,e                    |
| 23 (F/85)                                    | FRAIL     | 7.5145 a,b,d,e                  | 63 (M/87)                                    | NON-FRAIL | 1.4085 a,d,e                    | 127 (M/32)                                   | YOUNG     | 1.107 a                         |
| 24 (F/87)                                    | FRAIL     | 3.2258 a,d,e                    | 64 (M/70)                                    | NON-FRAIL | 2.1898 a                        | 128 (F/31)                                   | YOUNG     | 0,3953 a                        |
| 25 (F/88)                                    | FRAIL     | 3.3298 a,b,d,e                  | 65 (M/71)                                    | NON-FRAIL | 0.625 a                         | 129 (M/27)                                   | YOUNG     | 0 a,d,e                         |
| 26 (F/82)                                    | FRAIL     | 0 a,d,e                         | 66 (F/73)                                    | NON-FRAIL | 0.6173 a,d,e                    | 130 (M/28)                                   | YOUNG     | 0 a                             |
| 27 (F/78)                                    | FRAIL     | 3.7607 a,d,e                    | 67 (F/74)                                    | NON-FRAIL | 1.2987 a,b,d,e                  | 131 (F/29)                                   | YOUNG     | 0 a,d,e                         |
| 29 (M/90)                                    | FRAIL     | 3.3835 a,b,d,e                  | 68 (F/67)                                    | NON-FRAIL | 0.2257 a,d,e                    | 132 (F/27)                                   | YOUNG     | 0 a,b                           |
| 30 (M/75)                                    | FRAIL     | 5.0209 a                        | 70 (M/74)                                    | NON-FRAIL | 0 a                             | 134 (M/27)                                   | YOUNG     | 0 a                             |
| 31 (F/78)                                    | FRAIL     | 4.7452 a                        | 71 (F/85)                                    | NON-FRAIL | 0 a                             | 135 (M/28)                                   | YOUNG     | 0.4888 a                        |
| 32 (M/88)                                    | FRAIL     | 14.1791 a,d,e                   | 72 (M/75)                                    | NON-FRAIL | 1.6051 b,d                      | 136 (F/26)                                   | YOUNG     | 0.2153 a,b                      |
| 33 (F/80)                                    | FRAIL     | 2.6316 a,d,e                    | 73 (M/70)                                    | NON-FRAIL | 0.3231 b,d                      | 137 (F/34)                                   | YOUNG     | 0.2874 c,d                      |
| 34 (F/85)                                    | FRAIL     | 1.6514 a                        | 74 (M/70)                                    | NON-FRAIL | 0.6494 a                        | 138 (F/29)                                   | YOUNG     | 0.363 b,c,d                     |
| 37 (F/72)                                    | FRAIL     | 3.4483 c,d                      | 75 (M/65)                                    | NON-FRAIL | 0.2681 d                        | 139 (M/27)                                   | YOUNG     | 0.1127 c,d                      |
| 38 (M/86)                                    | FRAIL     | 1.1494 b,c,d                    | 76 (M/85)                                    | NON-FRAIL | 0.7426 a,b                      | 140 (F/28)                                   | YOUNG     | 0 c                             |
| 40 (F/92)                                    | FRAIL     | 4.3478 b,c                      | 77 (F/79)                                    | NON-FRAIL | 0.4348 a                        | 141 (F/26)                                   | YOUNG     | 0 b,c,d                         |
| 41 (M/79)                                    | FRAIL     | 0.8287 b,c,d                    | 78 (M/82)                                    | NON-FRAIL | 1.6393 c,d                      | 146 (F/30)                                   | YOUNG     | 0 a,d,e                         |
| 48 (F/85)                                    | FRAIL     | 3.3493 a                        | 79 (F/73)                                    | NON-FRAIL | 0.209 c,d                       |                                              |           |                                 |
|                                              |           |                                 | 82 (F/74)                                    | NON-FRAIL | 1.4706 c,d                      |                                              |           |                                 |
|                                              |           |                                 | 83 (M/82)                                    | NON-FRAIL | 0.2865 c,d                      |                                              |           |                                 |
|                                              |           |                                 | 84 (F/84)                                    | NON-FRAIL | 0 c,d                           |                                              |           |                                 |

Note. These percentages were previously analyzed (*J Gerontol A Biol Sci Med Sci.* 2022;27:1279-1286) in the same plasma used for this research.

a: percentage values of  $\gamma$ H2AXcHPSC present in the same plasma of subjects shown in Figure 2G. b: percentage of  $\gamma$ H2AXcHPSC present in the same plasma used for the treatments shown in Figure 2 I,J,K. c: percentage of  $\gamma$ H2AXcHPSC present in the same plasma used for the treatments shown in Figure 3B. d: percentage values of  $\gamma$ H2AXcHPSC of the individuals shown in the PCA of Figure 4A. e: percentage values of  $\gamma$ H2AXcHPSC of the individuals shown in the PCA of Figure 4B.

Sex: F=Female; M=Male. Age: years

### Supplementary eTable 5.

#### A. Plasma oxysterol and cholesterol precursor concentrations shown in Fig 3A

| Identification patient and plasma (Sex/Age) | PLASMA PHENOTYPE | 27-hydroxy cholesterol (27-OHC) µg/L | LATHOSTEROL µg/L | LANOSTEROL µg/L | 24-hydroxy cholesterol (24-OHC) µg/L |
|---------------------------------------------|------------------|--------------------------------------|------------------|-----------------|--------------------------------------|
| 19 (F/84)                                   | frail            | 109.31                               | 892.88           | 70.29           | 44.21                                |
| 22 (M/90)                                   | frail            | 149.06                               | 1425.08          | 127.53          | 46.94                                |
| 23 (F/84)                                   | frail            | 43.38                                | 522.56           | 44.09           | 25.96                                |
| 24 (F/87)                                   | frail            | 85.88                                | 554.48           | 60.07           | 42.55                                |
| 25 (F/88)                                   | frail            | 149.87                               | 1726.16          | 65.39           | 67.90                                |
| 26 (F/82)                                   | frail            | 105.50                               | 1007.76          | 70.13           | 56.70                                |
| 27 (F/78)                                   | frail            | 118.35                               | 1113.92          | 31.40           | 52.78                                |
| 29 (M/90)                                   | frail            | 51.03                                | 671.32           | 47.94           | 33.73                                |
| 30 (M/75)                                   | frail            | 64.91                                | 1086.52          | 56.06           | 24.23                                |
| 32 (M/88)                                   | frail            | 161.30                               | 1945.92          | 104.38          | 43.20                                |
| 33 (F/80)                                   | frail            | 82.76                                | 432.04           | 16.28           | 29.56                                |
| 35 (M/85)                                   | frail            | 59.57                                | 996.04           | 97.73           | 24.59                                |
| 37 (F/72)                                   | frail            | 129.37                               | 1536.56          | 181.83          | 50.04                                |
| 38 (M/86)                                   | frail            | 160.72                               | 1732.08          | 83.76           | 47.70                                |
| 40 (F/92)                                   | frail            | 137.60                               | 1131.04          | 109.92          | 65.20                                |
| 41 (M/79)                                   | frail            | 111.28                               | 1317.04          | 91.69           | 35.53                                |
| 42 (F/84)                                   | frail            | 85.14                                | 1327.48          | 152.55          | 36.76                                |
|                                             |                  |                                      |                  |                 |                                      |
| 57 (M/69)                                   | non-frail        | 132.87                               | 1521.04          | 59.23           | 25.52                                |
| 58 (F/67)                                   | non-frail        | 134.40                               | 1873.20          | 100.38          | 56.41                                |
| 59 (M/85)                                   | non-frail        | 118.52                               | 1330.84          | 50.91           | 57.71                                |
| 60 (M/87)                                   | non-frail        | 105.74                               | 1493.16          | 87.79           | 30.24                                |
| 61 (F/66)                                   | non-frail        | 178.60                               | 2374.24          | 190.18          | 50.47                                |
| 62 (M/66)                                   | non-frail        | 186.35                               | 2335.36          | 160.95          | 66.13                                |
| 63 (M/87)                                   | non-frail        | 177.11                               | 2140.56          | 96.78           | 43.74                                |
| 66 (F/73)                                   | non-frail        | 173.06                               | 1478.48          | 62.08           | 76.10                                |
| 67 (F/74)                                   | non-frail        | 140.05                               | 1638.96          | 68.15           | 65.56                                |
| 68 (F/67)                                   | non-frail        | 279.92                               | 2753.96          | 166.02          | 88.67                                |
| 72 (M/75)                                   | non-frail        | 227.73                               | 2733.24          | 155.76          | 73.94                                |
| 73 (M/70)                                   | non-frail        | 216.55                               | 2270.04          | 156.72          | 91.26                                |
| 75 (M/65)                                   | non-frail        | 258.23                               | 2779.88          | 156.95          | 70.02                                |
| 78 (M/82)                                   | non-frail        | 228.45                               | 2856.28          | 185.98          | 55.48                                |
| 79 (F/73)                                   | non-frail        | 146.81                               | 2056.40          | 111.10          | 58.61                                |
| 82 (F/74)                                   | non-frail        | 126.89                               | 1430.96          | 55.36           | 49.82                                |
| 83 (M/82)                                   | non-frail        | 193.87                               | 1908.96          | 106.15          | 63.22                                |
| 84 (F/84)                                   | non-frail        | 155.55                               | 1634.24          | 119.28          | 41.33                                |
|                                             |                  |                                      |                  |                 |                                      |
| 123 (F/29)                                  | young            | 137.36                               | 1721.52          | 60.35           | 67.79                                |
| 126 (M/34)                                  | young            | 131.21                               | 1601.60          | 50.29           | 53.06                                |
| 129 (M/27)                                  | young            | 153.92                               | 1868.04          | 81.17           | 69.88                                |
| 131 (F/29)                                  | young            | 127.19                               | 1493.92          | 64.69           | 58.82                                |
| 132 (F/27)                                  | young            | 114.82                               | 1471.68          | 41.93           | 59.87                                |
| 137 (F/34)                                  | young            | 171.26                               | 1898.76          | 77.34           | 79.20                                |
| 138 (F/29)                                  | young            | 148.34                               | 2129.28          | 82.88           | 76.39                                |
| 139 (M/27)                                  | young            | 161.84                               | 1941.00          | 67.34           | 76.61                                |
| 141 (F/26)                                  | young            | 113.19                               | 1344.60          | 56.06           | 49.97                                |
| 146 (F/30)                                  | young            | 134.27                               | 1504.36          | 50.73           | 65.70                                |

(Continued)

**Supplementary eTable 5 (continued)**

**B. Plasma oxysterol concentrations previously analyzed** (*J Gerontol A Biol Sci Med Sci.* 2022;27:1279-1286)

| Identification patient and plasma (Sex/Age) | PLASMA PHENOTYPE | 7 $\beta$ -hydroxy-cholesterol (7 $\beta$ OHC) $\mu$ g/L | 7-keto-cholesterol (7KC) $\mu$ g/L | 5 $\beta$ ,6 $\beta$ -epoxy-cholesterol (5 $\beta$ 6 $\beta$ -EC) $\mu$ g/L | 5 $\alpha$ ,6 $\alpha$ -epoxy-cholesterol (5 $\alpha$ 6 $\alpha$ -EC) $\mu$ g/L | 3 $\beta$ ,5 $\alpha$ ,6 $\beta$ -3hydroxy-cholesterol (3 $\beta$ ,5 $\alpha$ ,6 $\beta$ -3OHC) $\mu$ g/L |
|---------------------------------------------|------------------|----------------------------------------------------------|------------------------------------|-----------------------------------------------------------------------------|---------------------------------------------------------------------------------|-----------------------------------------------------------------------------------------------------------|
| 19 (F/84)                                   | frail            | 23                                                       | 42.14                              | 54.74                                                                       | 50.23                                                                           | 31.98                                                                                                     |
| 22 (M/90)                                   | frail            | 16                                                       | 33.82                              | 44.90                                                                       | 41.57                                                                           | 29.34                                                                                                     |
| 23 (F/84)                                   | frail            | 15                                                       | 25                                 | 21.51                                                                       | 18.51                                                                           | 7.96                                                                                                      |
| 24 (F/87)                                   | frail            | 17.92                                                    | 37.86                              | 38.68                                                                       | 35.66                                                                           | 15.90                                                                                                     |
| 25 (F/88)                                   | frail            | 18.52                                                    | 39.38                              | 46.26                                                                       | 29.13                                                                           | 25.18                                                                                                     |
| 26 (F/82)                                   | frail            | 19.12                                                    | 36.42                              | 48.14                                                                       | 38.44                                                                           | 29.02                                                                                                     |
| 27 (F/78)                                   | frail            | 14.08                                                    | 30.3                               | 39.76                                                                       | 35.16                                                                           | 21.26                                                                                                     |
| 29 (M/90)                                   | frail            | 24.6                                                     | 47.64                              | 61.90                                                                       | 49.86                                                                           | 30.50                                                                                                     |
| 30 (M/75)                                   | frail            | 14.36                                                    | 24.54                              | 29.71                                                                       | 19.31                                                                           | 8.02                                                                                                      |
| 32 (M/88)                                   | frail            | 16.08                                                    | 28.76                              | 28.55                                                                       | 24.07                                                                           | 11.20                                                                                                     |
| 33 (F/80)                                   | frail            | 25.64                                                    | 52.54                              | 58.32                                                                       | 48.88                                                                           | 38.30                                                                                                     |
| 35 (M/85)                                   | frail            | 12.88                                                    | 25.16                              | 22.51                                                                       | 24.92                                                                           | 9.92                                                                                                      |
| 37 (F/72)                                   | frail            | 21.76                                                    | 43                                 | 57.59                                                                       | 40.19                                                                           | 33.56                                                                                                     |
| 38 (M/86)                                   | frail            | 18.24                                                    | 31.7                               | 55.43                                                                       | 43.89                                                                           | 26.36                                                                                                     |
| 40 (F/92)                                   | frail            | 24.6                                                     | 43.58                              | 50.84                                                                       | 43.55                                                                           | 19.04                                                                                                     |
| 41 (M/79)                                   | frail            | 23.36                                                    | 44.16                              | 46.33                                                                       | 46.03                                                                           | 26.70                                                                                                     |
| 42 (F/84)                                   | frail            | 25.48                                                    | 47.06                              | 50.01                                                                       | 52.59                                                                           | 27.02                                                                                                     |
| 57 (M/69)                                   | non-frail        | 8.12                                                     | 21.98                              | 4.86                                                                        | 17.09                                                                           | 6.24                                                                                                      |
| 58 (F/67)                                   | non-frail        | 9                                                        | 34.98                              | 9.87                                                                        | 23.33                                                                           | 13.46                                                                                                     |
| 59 (M/85)                                   | non-frail        | 9.8                                                      | 24.28                              | 14.72                                                                       | 22.32                                                                           | 16.84                                                                                                     |
| 60 (M/87)                                   | non-frail        | 8.44                                                     | 30.24                              | 6.75                                                                        | 25.26                                                                           | 11.12                                                                                                     |
| 61 (F/66)                                   | non-frail        | 11.36                                                    | 37.5                               | 14.30                                                                       | 37.62                                                                           | 19.10                                                                                                     |
| 62 (M/66)                                   | non-frail        | 8.96                                                     | 26.14                              | 16.03                                                                       | 30.05                                                                           | 17.10                                                                                                     |
| 63 (M/87)                                   | non-frail        | 6.96                                                     | 17.02                              | 10.01                                                                       | 21.08                                                                           | 9.30                                                                                                      |
| 66 (F/73)                                   | non-frail        | 11.12                                                    | 35.74                              | 19.19                                                                       | 41.08                                                                           | 18.02                                                                                                     |
| 67 (F/74)                                   | non-frail        | 8                                                        | 29.14                              | 8.99                                                                        | 17.93                                                                           | 8.20                                                                                                      |
| 68 (F/67)                                   | non-frail        | 10.44                                                    | 29.32                              | 15.89                                                                       | 33.08                                                                           | 18.70                                                                                                     |
| 72 (M/75)                                   | non-frail        | 7.04                                                     | 22.76                              | 5.21                                                                        | 16.81                                                                           | 6.66                                                                                                      |
| 73 (M/70)                                   | non-frail        | 8.56                                                     | 24.96                              | 10.69                                                                       | 26.03                                                                           | 9.98                                                                                                      |
| 75 (M/65)                                   | non-frail        | 8.72                                                     | 29.2                               | 10.82                                                                       | 29.32                                                                           | 13.06                                                                                                     |
| 78 (M/82)                                   | non-frail        | 8.28                                                     | 23.14                              | 15.05                                                                       | 25.01                                                                           | 14.84                                                                                                     |
| 79 (F/73)                                   | non-frail        | 6.6                                                      | 19.44                              | 3.33                                                                        | 12.94                                                                           | 4.76                                                                                                      |
| 82 (F/74)                                   | non-frail        | 7.16                                                     | 26.48                              | 5.82                                                                        | 19.07                                                                           | 9.66                                                                                                      |
| 83 (M/82)                                   | non-frail        | 8.56                                                     | 22.72                              | 6.96                                                                        | 23.05                                                                           | 9.74                                                                                                      |
| 84 (F/84)                                   | non-frail        | 6.48                                                     | 15.48                              | 7.51                                                                        | 11.98                                                                           | 6.34                                                                                                      |
| 123 (F/29)                                  | young            | 5.4                                                      | 20.18                              | 6.99                                                                        | 13.09                                                                           | 8.10                                                                                                      |
| 126 (M/34)                                  | young            | 6.56                                                     | 29.04                              | 10.19                                                                       | 19.25                                                                           | 10.70                                                                                                     |
| 129 (M/27)                                  | young            | 6.36                                                     | 29.16                              | 9.51                                                                        | 25.81                                                                           | 8.90                                                                                                      |
| 131 (F/29)                                  | young            | 5.24                                                     | 18.28                              | 5.95                                                                        | 8.77                                                                            | 6.50                                                                                                      |
| 132 (F/27)                                  | young            | 6.2                                                      | 27.08                              | 10.88                                                                       | 29.23                                                                           | 10.92                                                                                                     |
| 137 (F/34)                                  | young            | 6.88                                                     | 29.74                              | 12.35                                                                       | 26.75                                                                           | 12.12                                                                                                     |
| 138 (F/29)                                  | young            | 5.76                                                     | 21.38                              | 9.54                                                                        | 15.45                                                                           | 10.54                                                                                                     |
| 139 (M/27)                                  | young            | 5.68                                                     | 25.9                               | 8.37                                                                        | 18.11                                                                           | 8.58                                                                                                      |
| 141 (F/26)                                  | young            | 5.8                                                      | 24.52                              | 6.48                                                                        | 13.75                                                                           | 5.28                                                                                                      |
| 146 (F/30)                                  | young            | 6.32                                                     | 30.18                              | 7.95                                                                        | 10.37                                                                           | 7.08                                                                                                      |

Note. Each analyte of this Supplementary eTable was evaluated in the same batch of plasma. All the concentrations of this analytes were all used as variables of the oxidative status domain for the PCA shown in Figure 4, as summarized in Supplementary Table 1B.

Sex: F=Female; M=Male. Age: years



### Supplementary eTable 6.

#### Intracellular ROS in NS cells

| ID Culture (SEX/AGE) | ID plasma donors | PLASMA PHENOTYPE | SEX plasma donors | AGE plasma donors | MEDIAN of intracellular ROS fluorescence |
|----------------------|------------------|------------------|-------------------|-------------------|------------------------------------------|
| <b>C263 (M/57)</b>   |                  | untreated        |                   |                   | 303.24                                   |
| <b>C263</b>          | 137              | young            | F                 | 34                | 243.04                                   |
| <b>C263</b>          | 82               | non-frail        | F                 | 74                | 284.08                                   |
| <b>C263</b>          | 38               | frail            | M                 | 86                | 634.39                                   |
| <b>C265 (M/75)</b>   |                  | untreated        |                   |                   | 258.5                                    |
| <b>C265</b>          | 141              | young            | F                 | 26                | 357.1                                    |
| <b>C265</b>          | 83               | non-frail        | M                 | 82                | 311.94                                   |
| <b>C265</b>          | 40               | frail            | F                 | 92                | 316.58                                   |
| <b>C316 (M/77)</b>   |                  | untreated        |                   |                   | 504.48                                   |
| <b>C316</b>          | 138              | young            | F                 | 29                | 493.03                                   |
| <b>C316</b>          | 84               | non-frail        | F                 | 84                | 605.15                                   |
| <b>C316</b>          | 22               | frail            | M                 | 90                | 686.15                                   |
| <b>C318 (F/84)</b>   |                  | untreated        |                   |                   | 219.85                                   |
| <b>C318</b>          | 139              | young            | M                 | 27                | 256.02                                   |
| <b>C318</b>          | 78               | non-frail        | M                 | 82                | 260.00                                   |
| <b>C318</b>          | 37               | frail            | F                 | 72                | 537.59                                   |
| <b>C319 (M/64)</b>   |                  | untreated        |                   |                   | 131.29                                   |
| <b>C319</b>          | 140              | young            | F                 | 28                | 118.94                                   |
| <b>C319</b>          | 79               | non-frail        | F                 | 73                | 100.06                                   |
| <b>C319</b>          | 41               | frail            | M                 | 79                | 162.24                                   |

#### Ratio of medians treated/untreated

| ID Culture (SEX/AGE) | C263 (M/57) | C265 (M/75) | C316 (M/77) | C318 (F/84) | C319 (M/64) | Mean of ratios treated/untreated | SD   |
|----------------------|-------------|-------------|-------------|-------------|-------------|----------------------------------|------|
| <b>Untreated</b>     | 1.00        | 1.00        | 1.00        | 1.00        | 1.00        | 1.00                             | 0.00 |
| <b>Young</b>         | 0.80        | 1.38        | 0.98        | 1.16        | 0.91        | 1.05                             | 0.23 |
| <b>Non-frail</b>     | 0.94        | 1.21        | 1.20        | 1.18        | 0.76        | 1.06                             | 0.20 |
| <b>Frail</b>         | 2.09        | 1.23        | 1.36        | 2.45        | 1.24        | 1.67                             | 0.56 |

Note. Sex: F=Female; M=Male. Age: years

**Supplementary eTable 8. Principal component analysis (PCA) related to Figure 4**

|                                                                                                                       | PCs | Explained Variance (%) | Cumulative Explained Variance (%) | Dominating Original Variables                                                                                                                                    |
|-----------------------------------------------------------------------------------------------------------------------|-----|------------------------|-----------------------------------|------------------------------------------------------------------------------------------------------------------------------------------------------------------|
| Related to Figure 4A - Variables concerning: oxidative status, cytokines, $\gamma$ -H2AXcHPSC                         | PC1 | 30                     | 30                                | CD40, IL-6, TGF $\alpha$ , IL-4, IL-8, TNF $\alpha$ , LATHOSTEROL*, 7BOHC, 7KC, 5B6B-EPOXY, 5A6A-EPOXY, TRIOL, 27OHC*, 24OHC*                                    |
|                                                                                                                       | PC2 | 12                     | 42                                | CCL2*, IL-4*, FLT-3LIGAND*, CCL4*, IL-10*                                                                                                                        |
| Related to Figure 4B - Variables concerning: oxidative status, cytokines, $\gamma$ -H2AXcHPSC, SFE, $\gamma$ -H2AXNSC | PC1 | 32                     | 30                                | CD40*, IL-6*, CXCL10*, TGF $\alpha$ *, IL-4*, TNF $\alpha$ *, LATHOSTEROL, 7BOHC*, 7KC*, 5B6B-EPOXY*, 5A6A-EPOXY*, TRIOL*, 27OHC, 24OHC, $\gamma$ -H2AXRSC*, SFE |
|                                                                                                                       | PC2 | 12                     | 44                                | IL-1A*, CXCL10, TGF $\alpha$ , CCL2, IL-4, IL-8, FLT-3LIGAND, LATHOSTEROL, LANOSTEROL, 27OHC                                                                     |
| Related to Figure 4C - Variables concerning: oxidative status                                                         | PC1 | 58                     | 58                                | LATHOSTEROL, 7BOHC*, 7KC*, 5B6B-EPOXY*, 5A6A-EPOXY*, TRIOL*, 27OHC, 24OHC                                                                                        |
|                                                                                                                       | PC2 | 27                     | 85                                | LATHOSTEROL, LANOSTEROL, 5A6A-EPOXY, TRIOL, 27OHC, 24OHC                                                                                                         |
| Related to Figure 4D - Variables concerning: cytokines                                                                | PC1 | 25                     | 25                                | CD40, IL-1 $\alpha$ , IL-6, CXCL10, IL-4, IL-8, IL-15, TNF $\alpha$ , IL-1 $\beta$ , IL-2                                                                        |
|                                                                                                                       | PC2 | 12                     | 37                                | CX3CL1, CD40, IL-6*, CCL11, FLT-3LIGAND, CCL4, IL-1 $\beta$ *, IL-2*, IL-10                                                                                      |
| Related to Figure 4E - Variables concerning: oxidative status, cytokines                                              | PC1 | 31                     | 31                                | CD40, IL-6, TGF $\alpha$ , IL-4, IL-8, TNF $\alpha$ , LATHOSTEROL*, 7BOHC, 7KC, 5B6B-EPOXY, 5A6A-EPOXY, TRIOL, 27OHC*, 24OHC*                                    |
|                                                                                                                       | PC2 | 12                     | 43                                | CCL2*, IL-4*, FLT-3LIGAND*, CCL4*, IL-10*                                                                                                                        |

Note. First two principal components (PCs) of each considered variable combination described by the proportion of cumulative explained variance and dominating original variables (\* indicates negative load).. The panels of Figure 4 to which the data were referred are reported.

## Supplementary eMethods

### Comorbid conditions

The comorbid conditions considered in this research are routinely recorded in the Acute Geriatrics Unit for all inpatients or outpatients. To be recorded, each disease needed to be confirmed by the participants' medical history. Here, some additional details about these conditions are provided. Heart failure was identified if there was any record of access to the emergency department or hospitalization with this diagnosis, along with evidence of active drug treatment. Ischemic heart disease encompassed all previous episodes defined as myocardial infarction, as confirmed by electrocardiogram and/or changes in the levels of cardiac enzymes, or any history of coronary artery bypass graft or coronary stenting. Peripheral vascular disease included all documented instances of *claudicatio intermittens*, a history of bypass interventions on peripheral arteries, and all abdominal or thoracic aneurysms that had not undergone surgical treatment. Cerebrovascular diseases included transient ischemic attack (TIA), minor stroke or stroke with minor or no *sequelae*, and strokes with evident *sequelae*. Epilepsy included any history of seizures controlled by a specific drug therapy. Chronic obstructive pulmonary disease (COPD) and asthma were recorded if previously certified by a specialist. Solid tumors and leukemia were recorded if a medical history emerged within the previous 5 years. However, patients needed to be free from active treatments for at least one year, and clinical remission had to be certified by a specialist for enrollment in this study. Rheumatic diseases included rheumatoid arthritis, connective tissue disease, and *polymyalgia rheumatica*. Gastrointestinal diseases were recorded in cases of a history of peptic ulcer or gastrointestinal bleeding. We excluded inflammatory bowel diseases because of their chronic inflammatory phenotype and the recurrent need for specific drug treatments. Regarding renal insufficiency, individuals with moderate or severe chronic kidney disease were not enrolled. However, individuals with a diagnosis of mild (stage 2, 60-89 mL/min/1.73 m<sup>2</sup>) or mild-moderate (stage 3a, 45-59 mL/min/1.73 m<sup>2</sup>) reduction of the glomerular filtration rate with a normal to mildly increased albumin:creatinine ratio (<3 mg/mmol) were included. For the purpose of overall data integration, the older adults were stratified by the comorbidity cutoff 2, generating subgroups with  $\leq 2$  and  $> 2$  pathologies (1).

### Plasma Cytokines quantification

The concentrations (pg/mL) of 38 cytokines (Supplementary eTable 7A) in the plasma of frail, non-frail, and young individuals were evaluated using the Human Magnetic Luminex Screening Assay, performed as a service by Labospace s.r.l. (Milano, Italy). At the time of the analysis, the aliquots of collected plasma, needed a 2-fold dilution, except for analyses of the RANTES and PDGF BB, which needed a 50-fold dilution. The concentrations of all cytokines, tested in duplicate in each plasma sample, were evaluated according to the manufacturer's instructions. Briefly, 50  $\mu$ l of plasma sample or standard (for the standard curve preparation) followed by 50  $\mu$ l of Microparticle Cocktail were added to the wells of a 96-well plate and incubated for 2 hours at RT on a shaker. Cytokine-specific antibodies were precoated onto magnetic microparticles embedded with fluorophores at set ratios for each unique microparticle region. The immobilized antibodies bound the cytokines of interest, and each well was then washed three times with wash buffer. After washing, 50  $\mu$ L of diluted biotinylated antibody cocktail specific to the cytokines of interest was added to each well. This was followed by incubation for 1 hour at RT on a shaker, after which each well was washed three times with wash buffer. Following washes, 50  $\mu$ L of diluted streptavidin-phycoerythrin conjugate (streptavidin-PE), which binds to the biotinylated antibody, was added to each well. The mixture was then incubated for 30 minutes at RT on a shaker, and again, each well was washed three times with wash buffer. The microparticles were resuspended in buffer, and the plate was read within 90 minutes on a Bio-Rad Bio-Plex100 (Bio-Rad). The specific characteristics of each kit used are summarized in Supplementary eTable 7A.

The Quality Control on the instrument tests have been performed using:

Bio-Plex Calibration kit code 171203060 lot 64270078 and Bio-Plex Validation kit code 171203001 lot 64239064.

All the data obtained have been checked by the technical Dept. of Labospace. The Quality Control parameters to be satisfied were: the % ratio between the values of the standard curve of each analyte with the values provided by the manufacturer of the kits used, and the similarity of the replicates evaluated by the Coefficient of Variation % (CV%) that had not to exceed 15%. For each cytokine the mean Coefficient of Variation % has been reported in the Supplementary eTable 7A

### Statistical analysis, principal component analysis (PCA)

The different variables were checked to see whether there were differences among female, male, female+male (combined gender) in each single group (frail, non-frail, young). No differences were evidenced, therefore, were presented the data of combined gender to keep more robust the statistically analysis.

In PCA, the variables, first examined individually for their differences in the frail, non-frail and young groups, were then also examined collectively through principal component analysis (PCA) (2). The focus of PCA was on understanding the combined behavior of all variables rather than evaluating each individually. We previously conducted a sensitivity analysis by incorporating age and sex variables into the principal component analysis (PCA) to evaluate their impact on the explained variability and overall data structure. Our findings indicated that these two variables did not alter the overall data structure and we decided not to include age and sex in PCA. Therefore, the variables used were grouped into 5 different domains: i) plasma oxidative status (oxysterols and cholesterol

precursors), ii) plasma inflammatory cytokines, iii) DNA-damaged homologous cHPSCs (herein referred as to  $\gamma$ -H2AXcHPSCs), iv) SFEs, and v) DNA-damaged allogeneic NS cells (herein referred as to  $\gamma$ -H2AXNSCs). The intent was to uncover both domain-specific characteristics and overarching trends. In the different domains, the variables considered promising for expressing differences, due to their biological interest were i) all analyzed oxysterols and cholesterol precursors; ii) inflammatory cytokines (CX3CL1, CXCL9, CXCL10, CCL2, CD40, TGF $\alpha$ , TNF $\alpha$ , TNF $\beta$ , IL-1 $\alpha$ , IL-1 $\beta$ , IL-2, IL-4, IL-6, IL-8, IL-10, IL-15, IL17, CCL4, CCL11, FLT-3LIGAND, RANTES); iii)  $\gamma$ -H2AXcHPSC; iv) SFE; and v)  $\gamma$ -H2AXNSC. This multifaceted approach allowed for a thorough and nuanced understanding of the data structure. Prior to PCA, all variables were standardized to ensure equal contribution to the overall variance. Significant variables and potential outliers were identified through PCA. The highly contributing (dominating) variables were defined as those with loadings in absolute value greater than half the maximum absolute loading for a given principal component (2). The sign of the loading was also considered for interpretation. The relationship between variables was also interpreted based on the loadings on the PCs. PCA was performed through R software, version 4.1.2, 2021-11-01, using the *prcomp* function (R Core Team, 2013. R: A Language and Environment for Statistical Computing. R Foundation for Statistical Computing, Vienna. <http://www.R-project.org/>).

## **Supplementary eReferences**

1. Johnston MC, Crilly M, Black C, Prescott GJ, Mercer SW (2018). Defining and measuring multimorbidity: a systematic review of systematic reviews. *Eur J Public Health*, 29:182–189.
2. Jolliffe IT. *Principal component analysis* Second Edition. New York: Springer; 2002.
